# Supplementary material for: Integrating gene synthesis and microfluidic protein analysis for rapid protein engineering
Source: PubMed Central journal article supplement — Nucleic Acids Res. 2015 Dec 23;44(7):e68. doi: 10.1093/nar/gkv1497 (PMC4838357; doi:10.1093/nar/gkv1497), 2015-12-23
Supplement: supp_gkv1497_nar-02501-met-k-2015-File005.pdf [file supp_gkv1497_nar-02501-met-k-2015-File005.pdf]

**Supplementary Table 1: APE gene assembly oligomers**

| Oligomer Name                   | Sequence (5' to 3')                                                           |
|---------------------------------|-------------------------------------------------------------------------------|
| Oligo1Finger3 (O1F3)            | ttgcgacatctgcggtcgtaaattcgctXXXXXXXXXXXXXXXXXXXXXcacacccaaaatccacctgcgctcaga  |
| Oligo2Linker3-2 (O2link3-2)     | cacatccgtacccacaccggtgaaaaaccggttcgcttgcgacatctgcggtcgtaaatttc                |
| Oligo3Finger2 (O3F2)            | CCAatgtagaatttgtatgagaaatttctctXXXXXXXXXXXXXXXXXXXXXcacatccgtacccacaccggtgaaa |
| Oligo4Linker2-1 (O4link2-1)     | catattagaattcatactggacaaaAACCATTCCAatgtagaatttgtatgagaaatttc                  |
| Oligo5Finger1 (O5F1)            | tgaatcttgcgaccgctgctttctctXXXXXXXXXXXXXXXXXXXXXcatattagaattcatactggacaaa      |
| Biotinylated seed oligo         | biotin-tctgacgcaggtggattttggtgtg                                              |
| Assembly check-f (5'chk3-fin1)  | tgaatcttgcgaccgctgctttctct                                                    |
| Assembly check-r (zif268-3'chk) | tctgacgcaggtggattttggtgtg                                                     |

Where xxxxx indicates location of 21 nt coding for 7 amino acids in positions -1 to 6 of recognition helix.

**Supplementary Table 2: Oligomers for generation of linear expression template with GFP fusion**

| Oligomer Name         | Sequence (5' to 3')                                                                       |
|-----------------------|-------------------------------------------------------------------------------------------|
| yEmCitrine-R1-f       | CCTCTAGAAATAATTTTGTAACTTAAGAAGGAGGAAAAAAAAatgtctaaagtggaagaattattcac                      |
| yEmCitrine-r          | GTAGCAGCCTGAGTCGTTATTATTTGTACAATTCATCCATACCATGG                                           |
| Proline-linker-EGFP-f | cacacccaaaatccacctgcgctcagaaagaccagcgcagccatctaaagtggaagaattattcac                        |
| EGFP-His6-r           | GTAGCAGCCTGAGTCGTTATTATgatgatgatgatgatgagaaacccccTTTGTACAATTCATCCATACCATGG                |
| Genespecific-f        | AGAAATAATTTTGTAACTtaagaaggaggaaaaaaaaaattggaacgctcgtacgcttgcggtggaatcttgcgaccgctgctttctct |
| Extension-f           | gatcttaaggctagagtacTAATACGACTCACTATAGGGAGACCACAACGGTTTCCTCTAGAAATAATTTTGTAACTtaagaagga    |
| Extension-r           | CAAAAAACCCCTCAAGACCCGTTTAGAGGCCCAAGGGGTTATGCTAGGTAGCAGCCTGAGTCG                           |
| 5'final_highTm        | Cy3-gatcttaaggctagagtacTAATACGACTCACTATAGGG                                               |
| 3'final_highTm        | CAAAAAACCCCTCAAGACCCGTTTAGAG                                                              |

**Supplementary Table 3: Error rate analysis for APE synthesis**

| ZF synthesis method (polymerase used for extension) | # of full-length sequence reads (out of 32) | Total kb of interest sequence | # deletion events | # insertion events | # substitution events | Total error events | Error/kb |
|-----------------------------------------------------|---------------------------------------------|-------------------------------|-------------------|--------------------|-----------------------|--------------------|----------|
| Phusion -gel stab                                   | 32                                          | 7.648                         | 4                 | 2                  | 0                     | 6                  | 0.785    |
| Phusion +gel stab                                   | 32                                          | 7.648                         | 5                 | 0                  | 1                     | 6                  | 0.785    |
| Klenow +gel stab                                    | 28                                          | 6.692                         | 15                | 1                  | 1                     | 17                 | 2.54     |

**Supplementary Table 4: Klenow extension, Cy5-labelled target oligomer design**

| Oligomer Name | Sequence (5' to 3')                      |
|---------------|------------------------------------------|
| 5'CompCy5     | Cy5-GTCATACCGCCGGA                       |
| Target design | GGCCAAT X XXX XXX XXX X TTTCCGGCGGTATGAC |

Where xxxx indicates location of target sequence (11 nt target = 9 nt binding site with flanking nt on each end)

**Supplementary Table 5: Microarray robotic printing routine**

| Step         | Printing reagent                                                          | Stamps /spot | Stamps /ink | Humidity | Wash frequency                                         |
|--------------|---------------------------------------------------------------------------|--------------|-------------|----------|--------------------------------------------------------|
| 1 (prespot)  | 0.5% BSA in water                                                         | 1            | 4           | 45-55%   | No same-sample wash, 1 source well per linear template |
| 2            | Linear template printing (6 µL final PCR product + 64 µL 2% BSA in water) | 2            | 4           | 45-55%   | Wash after 32 inks                                     |
| 3 (overspot) | 0.5% BSA in water                                                         | 1            | 4           | 45-55%   | No same-sample wash, 1 source well per linear template |
| 4            | Cy5-DNA target printing (10 µL Klenow product + 60 µL 2% BSA in water)    | 3            | 3           | 45-55%   | Wash after 32 inks                                     |

**Supplementary Table 6: Gene synthesis technique comparison (for Figure 1d)**

| <b>year</b> | <b>Previously reported error rates (publication reference)</b>                                                                                                                                                 | <b>Assembly technique</b>       | <b>Before</b>                          |
|-------------|----------------------------------------------------------------------------------------------------------------------------------------------------------------------------------------------------------------|---------------------------------|----------------------------------------|
| 2004        | PA Carr et al, Protein mediated error correction for de novo DNA synth, NAR 2004                                                                                                                               | PCR assembly                    | 1.8 error/kb                           |
| 2004        | Xiong A-S et al, A simple, rapid, high fidelity and cost-effective PCR-based 2step DNA synthesis method for long gene sequences, NAR 2004                                                                      | PCR assembly<br>PTDS            | 0.84-6.72 error/kb                     |
| 2005        | Binkowski BF et al, Correcting errors in synthetic DNA through consensus shuffling, NAR 2005                                                                                                                   | PCR assembly                    | 0.98-1.3 errors/kb                     |
| 2005        | Fuhrmann M et al, Removal of mismatched bases from synthetic genes by enzymatic mismatch cleavage, NAR 2005                                                                                                    | ligation                        | 5.8-7.2 error/kb                       |
| 2006        | Xiong A-S et al, PCR-based accurate synthesis of long DNA sequences, NatureProtocols 2006                                                                                                                      | PCR assembly                    | <1 error/kb                            |
| 2007        | Kong DS et al, Parallel gene synthesis in a microfluidic device, NAR 2007                                                                                                                                      | PCR                             | 1.8-2.2 error/kb                       |
| 2007        | Mamedov TG et al, Rational denovo gene synth by rapid PCA and expression of endothelial protein-c and thrombin receptor genes, J Biotechnol 2007                                                               | PCR, PCA,<br>fastPCA            | 0.53-1.1 error/kb                      |
| 2008        | Marsic D et al, PCR-based gene synthesis to produce recombinant proteins for crystallization, BMC Biotech 2008                                                                                                 | SeqTBIO                         | 1-3 error/kb                           |
| 2009        | Ye H et al, Experimental analysis of gene assembly with TopDown one-step real-time gene synth, NAR 2009                                                                                                        | PCA assembly                    | no consideration of error rate         |
| 2010        | Matzas M et al, High-fidelity gene synthesis by retrieval of sequence-verified DNA identified using HT pyrosequencing, Nature Biotech 2010                                                                     | PCR assembly                    | 25 error/kb (starting oligomers)       |
| 2010        | Kosuri S et al, Scalable gene synth by selective amplification of DNA pools from highfidelity microchips, Nat Biotech 2010                                                                                     | PCR assembly                    | 0.67-0.88 errors/kb                    |
| 2010        | Borovkov AY et al, High-quality gene assembly directly from unpurified mixtures of microarray-synthesized oligos, NAR 2010                                                                                     | Ligation,<br>Overlapping<br>PCR | 2.7-2.9 errors/kb                      |
| 2011        | Quan J et al, Parallel onchip gene synth and application to optimization of protein expression, Nat Biotech 2011                                                                                               | PCA                             | 1.9 error/kb                           |
| 2012        | Saaem I et al, Error correction of microchip synthesized genes using Surveyor nuclease, NAR 2012                                                                                                               | nSDA-PCA,<br>PCR                | 1.9 error/kb                           |
| 2012        | Schwartz JJ et al, Accurate gene snthesis with tag-directed retrieval of sequence-verified DNA molecules, Nat Methods, 2012                                                                                    | Dialout PCR                     |                                        |
| 2012        | Ma S et al, Error Correction in gene synthesis technology, Trends Biotechnol, 2012                                                                                                                             | various                         |                                        |
| 2013        | Dormitzer PR et al, Synthetic generation of influenza vaccine viruses for rapid response to pandemics, Science translation med, 2013                                                                           | Ligation+PCA                    | 0.64-0.75errors/kb                     |
| 2014        | Wan W et al, Error removal in microchip-synthesized DNA using immobilized MutS, NAR 2014                                                                                                                       | PCR                             | 11.44-14.25/kb                         |
| 2014        | Currin A, et al, SpeedyGenes: an imporoved gene syntehsis method for efficient production of error-corrected, synthetic protein libraries for directed evolution, Protein Engineering, Design & Selection 2014 | PCR                             | functional colony output, no seq data  |
| 2015        | APE solid phase gene synthesis (this publication)                                                                                                                                                              | APE                             | 0.78error/kb (with Phusion polymerase) |

**Supplementary Table 7: DNA target sequences for ZF combinatorics (Figure 1f)**

| Oligomer Name | Sequence (5' to 3')                            |
|---------------|------------------------------------------------|
| target_BAA    | GGC CAA TTT GAG TGG GCG TTT TCC GGC GGT ATG AC |
| target_CAA    | GGC CAA TTA GAT TGG GCG TTT TCC GGC GGT ATG AC |
| target_DAA    | GGC CAA TTT GTA TGG GCG TTT TCC GGC GGT ATG AC |
| target_ABA    | GGC CAA TTA GCG GAC GCG TTT TCC GGC GGT ATG AC |
| target_ACA    | GGC CAA TTA GCG GTA GCG TTT TCC GGC GGT ATG AC |
| target_ADA    | GGC CAA TTA GCG GAT GCG TTT TCC GGC GGT ATG AC |
| target_AAB    | GGC CAA TTA GCG TGG GTG TTT TCC GGC GGT ATG AC |
| target_AAC    | GGC CAA TTA GCG TGG GCC TTT TCC GGC GGT ATG AC |
| target_AAD    | GGC CAA TTA GCG TGG GGA GTT TCC GGC GGT ATG AC |
| target_ABB    | GGC CAA TTA GCG GAC GTG TTT TCC GGC GGT ATG AC |
| target_CBB    | GGC CAA TTA GAT GAC GTG TTT TCC GGC GGT ATG AC |
| target_DBB    | GGC CAA TTT GTA GAC GTG TTT TCC GGC GGT ATG AC |
| target_BAB    | GGC CAA TTT GAG TGG GTG TTT TCC GGC GGT ATG AC |
| target_BCB    | GGC CAA TTT GAG GTA GTG TTT TCC GGC GGT ATG AC |
| target_BDB    | GGC CAA TTT GAG GAT GTG TTT TCC GGC GGT ATG AC |
| target_BBA    | GGC CAA TTT GAG GAC GCG TTT TCC GGC GGT ATG AC |
| target_BBC    | GGC CAA TTT GAG GAC GCC TTT TCC GGC GGT ATG AC |
| target_BBD    | GGC CAA TTT GAG GAC GGA GTT TCC GGC GGT ATG AC |
| target_ACC    | GGC CAA TTA GCG GTA GCC TTT TCC GGC GGT ATG AC |
| target_BCC    | GGC CAA TTT GAG GTA GCC TTT TCC GGC GGT ATG AC |
| target_DCC    | GGC CAA TTT GTA GTA GCC TTT TCC GGC GGT ATG AC |
| target_CAC    | GGC CAA TTA GAT TGG GCC TTT TCC GGC GGT ATG AC |
| target_CBC    | GGC CAA TTA GAT GAC GCC TTT TCC GGC GGT ATG AC |
| target_CDC    | GGC CAA TTA GAT GAT GCC TTT TCC GGC GGT ATG AC |
| target_CCA    | GGC CAA TTA GAT GTA GCG TTT TCC GGC GGT ATG AC |
| target_CCB    | GGC CAA TTA GAT GTA GTG TTT TCC GGC GGT ATG AC |
| target_CCD    | GGC CAA TTA GAT GTA GGA GTT TCC GGC GGT ATG AC |
| target_ADD    | GGC CAA TTA GCG GAT GGA GTT TCC GGC GGT ATG AC |
| target_BDD    | GGC CAA TTT GAG GAT GGA GTT TCC GGC GGT ATG AC |
| target_CDD    | GGC CAA TTA GAT GAT GGA GTT TCC GGC GGT ATG AC |
| target_DAD    | GGC CAA TTT GTA TGG GGA GTT TCC GGC GGT ATG AC |
| target_DBD    | GGC CAA TTT GTA GAC GGA GTT TCC GGC GGT ATG AC |
| target_DCD    | GGC CAA TTT GTA GTA GGA GTT TCC GGC GGT ATG AC |
| target_DDA    | GGC CAA TTT GTA GAT GCG TTT TCC GGC GGT ATG AC |
| target_DDB    | GGC CAA TTT GTA GAT GTG TTT TCC GGC GGT ATG AC |
| target_DDC    | GGC CAA TTT GTA GAT GCC TTT TCC GGC GGT ATG AC |
| target_BCA    | GGC CAA TTT GAG GTA GCG TTT TCC GGC GGT ATG AC |
| target_BDA    | GGC CAA TTT GAG GAT GCG TTT TCC GGC GGT ATG AC |
| target_CBA    | GGC CAA TTA GAT GAC GCG TTT TCC GGC GGT ATG AC |
| target_CDA    | GGC CAA TTA GAT GAT GCG TTT TCC GGC GGT ATG AC |
| target_DBA    | GGC CAA TTT GTA GAC GCG TTT TCC GGC GGT ATG AC |
| target_DCA    | GGC CAA TTT GTA GTA GCG TTT TCC GGC GGT ATG AC |
| target_ACB    | GGC CAA TTA GCG GTA GTG TTT TCC GGC GGT ATG AC |
| target_ADB    | GGC CAA TTA GCG GAT GTG TTT TCC GGC GGT ATG AC |
| target_CAB    | GGC CAA TTA GAT TGG GTG TTT TCC GGC GGT ATG AC |
| target_CDB    | GGC CAA TTA GAT GAT GTG TTT TCC GGC GGT ATG AC |

|                     |                                                |
|---------------------|------------------------------------------------|
| <b>target_DAB</b>   | GGC CAA TTT GTA TGG GTG TTT TCC GGC GGT ATG AC |
| <b>target_DCB</b>   | GGC CAA TTT GTA GTA GTG TTT TCC GGC GGT ATG AC |
| <b>target_ABC</b>   | GGC CAA TTA GCG GAC GCC TTT TCC GGC GGT ATG AC |
| <b>target_ADC</b>   | GGC CAA TTA GCG GAT GCC TTT TCC GGC GGT ATG AC |
| <b>target_BAC</b>   | GGC CAA TTT GAG TGG GCC TTT TCC GGC GGT ATG AC |
| <b>target_BDC</b>   | GGC CAA TTT GAG GAT GCC TTT TCC GGC GGT ATG AC |
| <b>target_DAC</b>   | GGC CAA TTT GTA TGG GCC TTT TCC GGC GGT ATG AC |
| <b>target_DBC</b>   | GGC CAA TTT GTA GAC GCC TTT TCC GGC GGT ATG AC |
| <b>target_ABD</b>   | GGC CAA TTA GCG GAC GGA GTT TCC GGC GGT ATG AC |
| <b>target_ACD</b>   | GGC CAA TTA GCG GTA GGA GTT TCC GGC GGT ATG AC |
| <b>target_BAD</b>   | GGC CAA TTT GAG TGG GGA GTT TCC GGC GGT ATG AC |
| <b>target_BCD</b>   | GGC CAA TTT GAG GTA GGA GTT TCC GGC GGT ATG AC |
| <b>target_CAD</b>   | GGC CAA TTA GAT TGG GGA GTT TCC GGC GGT ATG AC |
| <b>target_CBD</b>   | GGC CAA TTA GAT GAC GGA GTT TCC GGC GGT ATG AC |
| <b>target_268wt</b> | GGC CAA TTA GCG TGG GCG TTT TCC GGC GGT ATG AC |
| <b>target_37-12</b> | GGC CAA TTT GAG GAC GTG TTT TCC GGC GGT ATG AC |
| <b>target_92-1</b>  | GGC CAA TTA GAT GTA GCC TTT TCC GGC GGT ATG AC |
| <b>target_158-2</b> | GGC CAA TTT GTA GAT GGA GTT TCC GGC GGT ATG AC |

Supplementary Table 8: APE synthesis oligomers ZF combinatorics (Figure 1f)

| <b>Oligomer Name</b>     | <b>Sequence (5' to 3')</b>                                                           |
|--------------------------|--------------------------------------------------------------------------------------|
| <b>Zif268_Oligo1fin3</b> | ttgcgacatctgcggtcgtaaattcgctcgttctgacgaacgtaaacgtcacacccaaaatccacctgcgtcaga          |
| <b>Zif268_Oligo3fin2</b> | CCAatgtagaatttgatgagaaatttctctcgttctgaccacctgaccacccacatccgtaccacaccggtgaaa          |
| <b>Zif268_Oligo5fin1</b> | tgaatcttgcgaccgctggtttctctcgttctgacgaactgaccctcatattagaattcactactggacaaa             |
| <b>37-12Oligo1fin3</b>   | ttgcgacatctgcggtcgtaaattcgct <b>CGTCACGACCAGCTGACCCGT</b> cacacccaaaatccacctgcgtcaga |
| <b>37-12Oligo3fin2</b>   | CCAatgtagaatttgatgagaaatttctct <b>GACCGTGCTAACCTGCGTCGT</b> cacatccgtaccacaccggtgaaa |
| <b>37-12Oligo5fin1</b>   | tgaatcttgcgaccgctggtttctct <b>CGTAACTTCATCCTGCAGCGT</b> catattagaattcactactggacaaa   |
| <b>92-1Oligo1fin3</b>    | ttgcgacatctgcggtcgtaaattcgct <b>GAACGTGGTAACCTGACCCGT</b> cacacccaaaatccacctgcgtcaga |
| <b>92-1Oligo3fin2</b>    | CCAatgtagaatttgatgagaaatttctct <b>CAGCGTTCTTCTCTGGTTCGT</b> cacatccgtaccacaccggtgaaa |
| <b>92-1Oligo5fin1</b>    | tgaatcttgcgaccgctggtttctct <b>GACTCTCCGACCCGTCGT</b> catattagaattcactactggacaaa      |
| <b>158-2Oligo1fin3</b>   | ttgcgacatctgcggtcgtaaattcgct <b>CAGTCTACCTCTCTGCAGCGT</b> cacacccaaaatccacctgcgtcaga |
| <b>158-2Oligo3fin2</b>   | CCAatgtagaatttgatgagaaatttctct <b>GTTTCGTACAACCTGACCCGT</b> cacatccgtaccacaccggtgaaa |
| <b>158-2Oligo5fin1</b>   | tgaatcttgcgaccgctggtttctct <b>GACAAAACCAAACCTGCGTGT</b> catattagaattcactactggacaaa   |
